# Supplementary material for: Plastid Phylogenomic Analysis of Tordylieae Tribe (Apiaceae, Apioideae)
Source: MDPI journal article supplement (doi:10.3390/plants11050709), 2022-03-07
Supplement: s1 [file s1]

Figure S1. Alignment of matching sequences of insertions in ycf2, trnV-rrn16 and ycf2-trnL spacers.

|                          |               |                                                                                               |                                                                                                                                            |
|--------------------------|---------------|-----------------------------------------------------------------------------------------------|--------------------------------------------------------------------------------------------------------------------------------------------|
| <i>S.divaricata</i>      | in ycf2       | ...-aaaaatttcgcgggtgtacaaattgccaacagatctaccaaccaaattattgggagtatactgcggaacgcctcctag            | gtaggaggagatgaaaacgcgcgagagaagaacttaaggatttcgggaataacggaatagatagtgatttctttaaatcgcgcgctgggtggtggatatcagaagagaaatggtggagatcagaa              |
| <i>K.marginata</i>       | in trnV-rrn16 | gaataaaaccccccaattttaagattttattactttaccattccaatatatcaaacggagccttgggagtafcgcatctggaagaactcttag | aggaagcagatgaaaacattttggaaggaaaaatccaagaagttcagaaaaagggaaggaaatagttctttctatagatccgcgatagaaagattaatagaaagaaacagcaaga-agaCGgaattgtttaatc     |
| <i>D.anethifolia</i>     | in trnV-rrn16 | gaaaaaattttacgcctccacacactaccagtagtcatagaaaacaaaatactgggagcaagtagcgggaattcatcctgg             | ggaagaggatgaaagccttttggttcgaaaaagataaaagagttgaggcggatggaacagtagttctttctataaaatcgttggtgagtggtgatagacaaacaaatggaatattggaggaaatttcgcgcc       |
| <i>C.sativum</i>         | in trnV-rrn16 | tgtaaaaattttacgactctacacattaccatcctacgtatacaagataatactgggagaaaatagcggaaatcctcctgg             | ggaagaagatgaaagcctttgggttgaaaaagtgaaggagtcgaagcgggaagggaataaatagtttctttctataaaatcgcgcgctgaatggtgatacaaaaaacaatggaaggaggagaaacatccca        |
| <i>N.japonicum</i>       | in trnV-rrn16 | gaaacaattttctgcctctccaaactaccagcgttaattgaaacaaaaaactgggagcaagtagcgggaagtcacatcctgg            | ggagagaagatgaagtcctttggga-aaaaaattttaaaggaggttaggcggcatggaagaacagtcgtttctataaaatcgcgcgctgaatggtgatagacaaacaaagggaatattggaggaaatttcctcctc   |
| <i>T.lanatum</i>         | in trnV-rrn16 | gaaaaaattaagtgcctctacacactaccagcagaatagaaacagaaaatactgggagaaagtagcgggaattcctcctgg             | ggaagaggatgaaagccttttggttcgaaaaactaaaggagttgaagcggcatggaataacagttctttctatagatcgcgcgctgaatggtgatagacgaaaaagggaatattggaggaaatttcctactc       |
| <i>T.pestalozzae</i>     | in trnV-rrn16 | gaaaaaattaattgcctatccaa-actacaaactaccagtagtcatagaaaaaaagactgggagaaagtagcgggaattcactcctgg      | ggaagaaaaatgaaagccttttggttataaaaaactaaacgagttggaatcgggatggaataaatagtttctttctatagatcgcgcgctacctggtgatagacaaacaaatggaatattggaggaaatttcctcctc |
| <i>T.yunnanense</i>      | in trnV-rrn16 | gaaaaaattctcgcctctacacaataccagccttcatagaaaaaaagactgggagaaagtagcgggaagcctcctcctgg              | agaaagaaatgaaagccttttggttagaaaaactaaaagaggtgaggcggcatggaataacagttctttctataaaaaagcggctgaatggtgatataacaaaaaaatgcactatggaggagatttcctcctc      |
| <i>T.candicans</i>       | in trnV-rrn16 | gaaaaaattctcgcctctacacaataccagtccttcatagaaaaaaatactgggagcaagtagcgggaagtcctcctgc               | ggaagaagatgaaagccttttggttagaaaaataaaagaggtgaggcggcatggaataacagttctttctataaaagagcggctgaatggtgatagacaaacaaagggaatattggaggaa                  |
| <i>S.thomsonii</i>       | in trnV-rrn16 | gaaaaaattctcgcctctacacaataccagtccttcatagaaaaaaatactgggagcaagtagcgggaagtcctcctgc               | ggaagaagatgaaagccttttggttagaaaaataaaagaggtgaggcggcatggaataacagttctttctataaaagagcggctgaatggtgatagacaaacaaagggaatattggaggaaatttcctcctc       |
| <i>S.transiliensis</i>   | in trnV-rrn16 | gaaaaaattctcgcctctacacaataccagtccttcatagaaaaaaatactgggagcaagtagcgggaagtcctcctgc               | ggaaagaaatgaaagccttttggttagaaaaataaaagaggtgaggcggcatggaataacagttctttctataaaagagcggctgaatggtgatagacaaacaaagggaatattggaggaaatttcctcctc       |
| <i>Z.korovinii</i>       | in trnV-rrn16 | gaaaaaattctcgcctctacacaataccagtccttcatagaaaaaaatactgggagcaagtagcgggaagtcctcctgc               | ggaagaaaaatgaaagcatttggaaggaaaaataaaggaggtcgcggcagcagcgaaaaaagagtgctttctataaaatcgcgcgctgaatggtgatcagaaaaaaatggataggaggga--tttcttt          |
| <i>A.sinensis</i>        | in trnV-rrn16 | gttcgaattttacgcctctacacattaccaatcagggtatcaaacatacgcctgggaggaagcagcgggaagcctcctgg              |                                                                                                                                            |
| <i>P.pimpinellifolia</i> | in ycf2-trnL  | aaaattccaagactgtactcattaccaactgagttaaacccaataatactgggagaaagcagcgcgaacacttcctgg                | ggaaggaaaaatgaaatccaatggaaacaaaaataaaggaggtggagacgaaacgaaaaaatagtgatttctatagaacccacggctgaatggttgataaagaaa                                  |
| <i>P.sativa</i>          | in ycf2-trnL  | aaaattcgcgccctatataaattccaactgagttaaacccaataatactgggagaaagcagcgcgaacacttcctgg                 | ggaaggaaaaatgaaatccaatggaaacaaaaataaaggaggtggagacgaaacgaaaaaatagtgatttctatagaacccacggctgaatggttgataaataaaa                                 |
| <i>H.moellendorffii</i>  | in ycf2-trnL  | aaaattgcacgcctatatacattccaactgagttaaacccaataatactgggagaaagcagcgcgaacacttcctgg                 | ggaaggaaaaatgaaatccaatggaaacaaaaataaaggaggtggagacggaacgaaaaaatagtgatttctatagaacccacggctaaatggttgataaataaaa                                 |
| <i>H.yunngingense</i>    | in ycf2-trnL  | aaaattgcacgcctatataaattccaactgagttaaacccaataatactgggagaaagcagcgcgaacacttcctgg                 | ggaaggaaaaatgaaatccaatggaaacaaaaataaaggaggtggagacgaaacgaaaaaatagtgatttctatagaacccacggctgaatggttgataaactaaa                                 |
| <i>M.komarovii</i>       | in ycf2-trnL  | aaaattgcacgcctatatacattccaactgagttaaacccaataatactgggagaaagcagcgcgaacacttcctgg                 | ggaaggaaaaatgaaatccaatggaaacaaaaataaaggaggtggagacggaacgaaaaaatagtgatttctatagaacc                                                           |
| <i>S.graveolens</i>      | in ycf2-trnL  | aaaattgcacgcctatatacattccaactgagttaaacccaataatactgggagaaagcagcgcgaacacttcctgg                 | ggaaggaaaaatgaaatccaatggaaacaaaaataaaggaggtggagacggaacgaaaaaatagtgatttctatagaacc                                                           |
