# Supplementary material for: Plastid Phylogenomic Analysis of Tordylieae Tribe (Apiaceae, Apioideae)
Source: MDPI journal article supplement (doi:10.3390/plants11050709), 2022-03-07
Supplement: s1 [file s1]

**Table S2.** Survey for the presence of insertion in trnV(GAC)-rrn16 spacer.

| Species name                                                                  | Genbank accession | Length | Voucher   | Country     | Collection date | Collector                                                       |
|-------------------------------------------------------------------------------|-------------------|--------|-----------|-------------|-----------------|-----------------------------------------------------------------|
| <i>Cymbocarpum anethoides</i> DC.                                             | OL792759          | 832    | MW0700433 | Georgia     | 16-Jun-1988     | M.V. Kostyleva                                                  |
| <i>Ducrosia assadii</i> Alava                                                 | OL675434          | 448 bp | E950      | Iran        | 27-Apr-1977     | R. Alava                                                        |
| <i>Semenovia alaica</i> Lazkov                                                | OL631192          | 546 bp | MW0594097 | Kyrgyzstan  | 15-Jun-2006     | G. A. Lazkov                                                    |
| <i>Semenovia dasycarpa</i> Regel & Schmalh.) Korovin ex Pimenov & V.N.Tikhom. | OL675428          | 547 bp | MW0897150 | Tajikistan  | 07-Aug-2012     | E. V. Kljuykov & U. A. Ukrainskaya                              |
| <i>Semenovia dichotoma</i> (Boiss.) Manden.                                   | OL675432          | 533 bp | MW236     | Iran        | 07-Jun-2001     | M. G. Pimenov, E. V. Kljuykov, A. K. Sytin, F. Ghahremani-Nejad |
| <i>Semenovia eriocarpa</i> (Bornm. & Gauba) Lyskov & Kljuykov                 | OL792760          | 547    | MW0757072 | Iran        | 26-Jun-2019     | D. Lyskov                                                       |
| <i>Semenovia glabrior</i> (C.B.Clarke) Pimenov & Kljukov                      | OL631190          | 544 bp | MW s.n.   | North India | 26-Jul-2017     | U. A. Ukrainskaya                                               |
| <i>Semenovia heterodonta</i> (Korov.) Manden.                                 | OL675429          | 547 bp | MW0897143 | Tajikistan  | 31-Jul-2012     | E. V. Kljuykov & U. A. Ukrainskaya                              |
| <i>Semenovia pamirica</i> (Lipsky) Manden.                                    | OL675430          | 535 bp | LE27      | Tajikistan  | 21-Jul-1956     | S. Ikonnikov                                                    |
| <i>Semenovia pimpinellioides</i> (Nevski) Manden.                             | OL675427          | 551 bp | MW0864993 | Uzbekistan  | 14-Aug-2010     | M. G. Pimenov & E. V. Kljuykov                                  |
| <i>Semenovia tragioides</i> (Boiss.) Manden.                                  | OL631191          | 547 bp | MW0754182 | Iran        | 15-Jun-2014     | E. V. Kljuykov & D. F. Lyskov                                   |
| <i>Tetrataenium cardiocarpum</i> (Rech.f. & Riedl) Manden.                    | OL675433          | 543 bp | MW1259    | Pakistan    | 22-Aug-1990     | U. Schishkoff                                                   |
| <i>Tetrataenium olgae</i> (Regel & Schmalh.) Manden                           | OL675431          | 550 bp | MW0745065 | Afghanistan | 10-Jul-1974     | I. Gubanov                                                      |
| <i>Tordylium apulum</i> Rchb.                                                 | OL675435          | 529 bp | MW0745183 | Turkey      | 22-May-1995     | M. G. Pimenov & E. V. Kljuykov                                  |
| <i>Tordylium elegans</i> (Boiss. & Balansa) Alava & Hub.-Mor.                 | OL675436          | 538 bp | MHA6694   | Turkey      | 19-May-1967     | R. Alava                                                        |
| <i>Tordylium hasselquistiae</i> DC.                                           | OL675437          | 535 bp | MHA6605   | Turkey      | 12-May-1967     | R. Alava                                                        |
