# Supplementary material for: Plastid Phylogenomic Analysis of Tordylieae Tribe (Apiaceae, Apioideae)
Source: MDPI journal article supplement (doi:10.3390/plants11050709), 2022-03-07
Supplement: s1 [file s1]

**Table S1.** Gene contents in the eleven *Tordylieae* plastomes.

| Category         | Gene Groups                                  | Gene Names                                                                                                                                                                                                                                                                                                                                                                                                                                                                                                                                                                                                                                                                                                                    |
|------------------|----------------------------------------------|-------------------------------------------------------------------------------------------------------------------------------------------------------------------------------------------------------------------------------------------------------------------------------------------------------------------------------------------------------------------------------------------------------------------------------------------------------------------------------------------------------------------------------------------------------------------------------------------------------------------------------------------------------------------------------------------------------------------------------|
| Self-replication | Ribosomal RNA genes (rRNA)                   | <i>rrn5</i> <sup>a</sup> , <i>rrn4.5</i> <sup>a</sup> , <i>rrn16</i> <sup>a</sup> , <i>rrn23</i> <sup>a</sup>                                                                                                                                                                                                                                                                                                                                                                                                                                                                                                                                                                                                                 |
|                  | tRNA genes                                   | <i>trnA</i> -UGC <sup>a</sup> , <i>trnC</i> -GCA, <i>trnD</i> -GUC, <i>trnE</i> -UUC <sup>a</sup> , <i>trnF</i> -GAA, <i>trnG</i> -GCC, <i>trnG</i> -UCC <sup>a</sup> , <i>trnH</i> -GUG <sup>a1, a2</sup> , <i>trnI</i> -CAU, <i>trnI</i> -GAU <sup>a</sup> , <i>trnK</i> -UUU, <i>trnL</i> -CAA <sup>a1, a3</sup> , <i>trnL</i> -UAA, <i>trnL</i> -UAG, <i>trnM</i> -CAU, <i>trnM</i> -CAU, <i>trnN</i> -GUU <sup>a</sup> , <i>trnP</i> -UGG, <i>trnQ</i> -UUG, <i>trnR</i> -ACG <sup>a</sup> , <i>trnR</i> -UCU, <i>trnS</i> -GCU, <i>trnS</i> -GGA, <i>trnS</i> -UGA, <i>trnT</i> -GGU, <i>trnT</i> -UGU, <i>trnV</i> -GAC <sup>a1, a3, a4, a5</sup> , <i>trnV</i> -UAC <sup>a</sup> , <i>trnW</i> -CCA, <i>trnY</i> -GUA |
|                  | Ribosomal small subunit                      | <i>rps2</i> , <i>rps3</i> , <i>rps4</i> , <i>rps7</i> <sup>a1, a3, a4</sup> , <i>rps8</i> , <i>rps11</i> , <i>rps12_5'end</i> , <i>rps12_3'end</i> , <i>rps14</i> , <i>rps15</i> , <i>rps16</i> , <i>rps18</i> , <i>rps19</i>                                                                                                                                                                                                                                                                                                                                                                                                                                                                                                 |
|                  | Ribosomal large subunit                      | <i>rpl2</i> , <i>rpl14</i> , <i>rpl16</i> , <i>rpl20</i> , <i>rpl22</i> , <i>rpl23</i> , <i>rpl32</i> , <i>rpl33</i> , <i>rpl36</i>                                                                                                                                                                                                                                                                                                                                                                                                                                                                                                                                                                                           |
|                  | DNA-dependent RNA polymerase                 | <i>rpoA</i> , <i>rpoB</i> , <i>rpoC1</i> , <i>rpoC2</i>                                                                                                                                                                                                                                                                                                                                                                                                                                                                                                                                                                                                                                                                       |
| Photosynthesis   | Large subunit of rubisco                     | <i>rbcL</i>                                                                                                                                                                                                                                                                                                                                                                                                                                                                                                                                                                                                                                                                                                                   |
|                  | Photosystem I                                | <i>psaA</i> , <i>psaB</i> , <i>psaC</i> , <i>psaI</i> , <i>psaJ</i> , <i>psaI1</i> , <i>psaI2</i>                                                                                                                                                                                                                                                                                                                                                                                                                                                                                                                                                                                                                             |
|                  | Photosystem II                               | <i>psbA</i> , <i>psbB</i> , <i>psbC</i> , <i>psbD</i> , <i>psbE</i> , <i>psbF</i> , <i>psbH</i> , <i>psbI</i> , <i>psbJ</i> , <i>psbK</i> , <i>psbL</i> , <i>psbM</i> , <i>psbN</i> , <i>psbT</i> , <i>psbZ</i>                                                                                                                                                                                                                                                                                                                                                                                                                                                                                                               |
|                  | NADH dehydrogenase                           | <i>ndhA</i> , <i>ndhB</i> <sup>a1, a3</sup> , <i>ndhC</i> , <i>ndhD</i> , <i>ndhE</i> , <i>ndhF</i> , <i>ndhG</i> , <i>ndhH</i> , <i>ndhI</i> , <i>ndhJ</i> , <i>ndhK</i>                                                                                                                                                                                                                                                                                                                                                                                                                                                                                                                                                     |
|                  | Cytochrome b/f complex                       | <i>petA</i> , <i>petB</i> , <i>petD</i> , <i>petG</i> , <i>petL</i> , <i>petN</i>                                                                                                                                                                                                                                                                                                                                                                                                                                                                                                                                                                                                                                             |
|                  | ATP synthase                                 | <i>atpA</i> , <i>atpB</i> , <i>atpE</i> , <i>atpF</i> , <i>atpH</i> , <i>atpI</i>                                                                                                                                                                                                                                                                                                                                                                                                                                                                                                                                                                                                                                             |
| Other            | Maturase                                     | <i>matK</i>                                                                                                                                                                                                                                                                                                                                                                                                                                                                                                                                                                                                                                                                                                                   |
|                  | Subunit of acetyl-CoA carboxylase            | <i>accD</i>                                                                                                                                                                                                                                                                                                                                                                                                                                                                                                                                                                                                                                                                                                                   |
|                  | Envelope membrane protein                    | <i>cemA</i>                                                                                                                                                                                                                                                                                                                                                                                                                                                                                                                                                                                                                                                                                                                   |
|                  | ATP dependent protease subunit P             | <i>clpP</i>                                                                                                                                                                                                                                                                                                                                                                                                                                                                                                                                                                                                                                                                                                                   |
|                  | Translational initiation factor              | <i>infA</i>                                                                                                                                                                                                                                                                                                                                                                                                                                                                                                                                                                                                                                                                                                                   |
|                  | c-type cytochrome synthesis                  | <i>ccsA</i>                                                                                                                                                                                                                                                                                                                                                                                                                                                                                                                                                                                                                                                                                                                   |
|                  | Conserved open reading frames ( <i>ycf</i> ) | <i>ycf1</i> , <i>ycf2</i>                                                                                                                                                                                                                                                                                                                                                                                                                                                                                                                                                                                                                                                                                                     |

<sup>a</sup> genes in the IR regions (two copies in the plastome)<sup>a1</sup> duplicated gene in the IR regions of *Pastinaca*, *Mandenovia*, *Symphyoloma*<sup>a2</sup> duplicated gene in the IR regions of *Kalakia*, *Ducrosia*, *Zosima*<sup>a3</sup> duplicated gene in the IR regions of *Dasispermum*, *Notobubon*, *Tordylim maximum*<sup>a4</sup> duplicated gene in the IR regions of *Tordylium lanatum*<sup>a5</sup> duplicated gene in the IR regions of *Tordylim pestalozzae*
