# Supplementary material for: Plastid Phylogenomic Analysis of Tordylieae Tribe (Apiaceae, Apioideae)
Source: MDPI journal article supplement (doi:10.3390/plants11050709), 2022-03-07
Supplement: s1 [file s1]

**Table S3.** List of chloroplast genome sequences retrieved from Genbank for phylogenetic analysis.

| Species name                                                                                                               | Acc. number | Species name                       |
|----------------------------------------------------------------------------------------------------------------------------|-------------|------------------------------------|
| <i>Anethum graveolens</i>                                                                                                  | NC_029470   |                                    |
| <i>Angelica sinensis</i>                                                                                                   | reassembly  |                                    |
| <i>Apium graveolens</i>                                                                                                    | MK036045    |                                    |
| <i>Carum carvi</i>                                                                                                         | NC_029889   |                                    |
| <i>Cnidium officinale</i>                                                                                                  | NC_039760   |                                    |
| <i>Conioselinum anthriscoides</i> (H.Boissieu) Pimenov & Kljuykov, (Skvortsovia 2(1): 33 (2015).                           | NC_038088   | = <i>Ligusticum sinense</i>        |
| <i>Conioselinum pteridophyllum</i> (Franch.) Lavrova, (Abstr. Int. Sci. Conf. Syst. Higher Pl. 66 (2002)                   | NC_049056   | = <i>Ligusticum pteridophyllum</i> |
| <i>Conioselinum smithii</i> (H.Wolff) Pimenov & Kljuykov, (Willdenowia 33(2): 369 (2003)                                   | MT561037    | = <i>Ligusticum jeholense</i>      |
| <i>Conioselinum tenuissimum</i> (Nakai) Pimenov & Kljuykov, (Willdenowia 33(2): 373 (2003)                                 | NC_029394   | = <i>Ligusticum tenuissimum</i>    |
| <i>Coriandrum sativum</i>                                                                                                  | NC_029850   |                                    |
| <i>Crithmum maritimum</i>                                                                                                  | NC_015804   |                                    |
| <i>Cyclospermum leptophyllum</i>                                                                                           | MT561040    |                                    |
| <i>Foeniculum vulgare</i>                                                                                                  | KR011054    |                                    |
| <i>Heracleum moellendorffii</i>                                                                                            | NC_042242   |                                    |
| <i>Heracleum yungningense</i>                                                                                              | NC_047287   |                                    |
| <i>Levisticum officinale</i>                                                                                               | MT561024    |                                    |
| <i>Ligusticopsis hispida</i> (Franch.) Lavrova & Kljuykov, (Bot. Zhurn. (Moscow & Leningrad) 79(10): 106 (1994).           | NC_049053   | = <i>Ligusticum hispidum</i>       |
| <i>Ligusticopsis involucrata</i> (Franch.) Lavrova, (Turczaninowia 20(2): 171 (2017)                                       | NC_049054   | = <i>Ligusticum involucratum</i>   |
| <i>Nothosmyrnum japonicum</i>                                                                                              | MT561036    |                                    |
| <i>Pastinaca sativa</i>                                                                                                    | MT561034    |                                    |
| <i>Petroselinum crispum</i>                                                                                                | NC_015821   |                                    |
| <i>Prangos fedtschenkoi</i>                                                                                                | KY652265    |                                    |
| <i>Prangos lipskyi</i>                                                                                                     | KY652266    |                                    |
| <i>Prangos trifida</i>                                                                                                     | MG386251    |                                    |
| <i>Semenovia gyirongensis</i>                                                                                              | NC_042912   |                                    |
| <i>Semenovia thomsonii</i>                                                                                                 | reassembly  |                                    |
| <i>Semenovia transiliensis</i>                                                                                             | NC_045182   |                                    |
| <i>Seseli montanum</i>                                                                                                     | NC_027451   |                                    |
| <i>Seseli mucronatum</i> (Schrenk) Pimenov & Sdobnina, (Byull. Moskovsk. Obshch. Isp. Prir., Otd. Biol. 78(4): 139 (1973). | NC_049058   | = <i>Ligusticum thomsonii</i>      |
| <i>Tetrataenium candicans</i>                                                                                              | MK522402    |                                    |
| <i>Tetrataenium yunnanense</i>                                                                                             | NC_045183   |                                    |
